1 **Species detection within the *Echinococcus granulosus sensu lato* complex by novel probe-**  
2 **based Real-Time PCRs**

3

4 Running title: **Diagnosis and typing of *Echinococcus granulosus sensu lato***

5 **Authors**

6 Pavlo Maksimov<sup>1\*</sup>, Hannes Bergmann<sup>1</sup>, Marion Wassermann<sup>2</sup>, Thomas Romig<sup>2</sup>, Bruno  
7 Gottstein<sup>3,£</sup>, Adriano Casulli<sup>4</sup>, Franz J. Conraths<sup>1</sup>

8

9 **Affiliations**

10 <sup>1</sup>Friedrich-Loeffler-Institut, Federal Research Institute for Animal Health, Institute of  
11 Epidemiology, National Reference Centre for Echinococcosis, Greifswald-Insel Riems,  
12 Germany;

13 <sup>2</sup> Parasitology Unit, University of Hohenheim, Emil-Wolff-Str. 34, 70599 Stuttgart, Germany;

14 <sup>3</sup>Institute of Parasitology, Vetsuisse Faculty and Faculty of Medicine, University of Bern, Bern,  
15 Switzerland

16 <sup>4</sup>WHO Collaborating Centre for the Epidemiology, Detection and Control of Cystic and Alveolar  
17 Echinococcosis. Department of Infectious Diseases, Istituto Superiore di Sanità, Rome, Italy;

18 <sup>5</sup>European Reference Laboratory for Parasites, Department of Infectious Diseases, Istituto  
19 Superiore di Sanità, Rome, Italy.

20 <sup>£</sup>present address: Institute of Infectious Diseases, Faculty of Medicine, University of Bern, Bern,  
21 Switzerland

22

23 \*Corresponding author:

24 Email: pavlo.maksimov@fli.de

25 **Keywords**

26 *Echinococcus granulosus sensu lato* species diagnosis, Real-Time Polymerase Chain Reaction,

27 DNA probe

28

29 **Abstract**

30 Infections with eggs of *Echinococcus granulosus sensu lato (s.l.)* can cause cystic echinococcosis  
31 in intermediate host animals and humans. Upon ingestion of viable eggs, oncospheres hatch from  
32 the eggs and subsequently develop into fluid-filled larval cysts, most frequently in the liver or the  
33 lungs. The slowly growing cysts progressively interfere with organ function. The risk of infection  
34 is determined by the host range of the parasite, its pathogenicity and other epidemiologically  
35 relevant parameters, which differ significantly among the five species within the *E. granulosus*  
36 *s.l.* complex. It is therefore essential to diagnose the correct species within *E. granulosus s.l.* to  
37 help understand specific disease epidemiology and to facilitate effective implementation of  
38 control measures. For this purpose, simple, fast and cost-effective typing techniques are needed.

39  
40 We developed quantitative Real-Time Polymerase Chain Reactions (qPCRs) and corresponding  
41 sequence-specific hydrolysis DNA probes to target polymorphic regions in the mitochondrial  
42 genome of *E. granulosus s.l.*. In a single-step typing approach, we distinguished *E. granulosus*  
43 *s.l.* members in four epidemiologically relevant subgroups. These were *E. granulosus sensu*  
44 *stricto* (G1, G3), *E. equinus* (G4), *E. ortleppi* (G5) and the *E. canadensis* cluster (G6 to G8 and  
45 G10). The technique also allowed identification and differentiation of these species from other  
46 *Echinococcus* or *Taenia* taxa for samples isolated from cysts or faeces.

47  
48 Single-step genotyping techniques for the molecular diagnosis of *Echinococcus* spp. by qPCRs  
49 may not only improve diagnostic performance, but also our knowledge on the epidemiology of  
50 the parasites and help controlling the various agents of cystic echinococcosis.

51

52

## 53 **Introduction**

54 Infection with *Echinococcus granulosus sensu lato* (*E. granulosus s.l.*) (1) can cause cystic  
55 echinococcosis [CE] in animals and humans (2-5). The adult stages of *E. granulosus s.l.* are  
56 small, segmented tapeworms (Cestoda) that live in the small intestine of their definitive hosts,  
57 mostly wild or domestic canids or felids (6, 7). Adult worms release eggs that form the infectious  
58 stage for intermediate hosts. These eggs are shed in the faeces of the definitive hosts and are then  
59 ingested by intermediate hosts i.e. typically herbivores such as sheep, goats, cattle, deer or camels  
60 that are preyed upon by the definitive host (7). After ingestion of viable eggs, oncospheres hatch  
61 from the eggs and migrate from the gut into the target organs, mostly liver or lungs (8). Here, the  
62 oncospheres convert into the metacestode stage, a slowly growing, fluid-filled cyst containing  
63 protoscoleces. This process may progressively interfere with the function of the organs in which  
64 the cysts have localised and may lead to clinical or sub-clinical CE in the infected intermediate  
65 host (9). Finally, ingestion of fertile cystic material by a definite host, followed by development  
66 of the protoscoleces into egg-producing adult tapeworms in their small intestine completes the  
67 lifecycle of *E. granulosus s.l.* (8).

68  
69 Previously, *E. granulosus* was considered to be a single species, subdivided into ‘strains’ and  
70 genotypes (G1 to G8, G10 and the ‘lion strain’) (4), most of them associated with specific  
71 definitive-intermediate host relationships and geographic distribution patterns (7). Currently,  
72 some of these taxa are considered distinct species within the *E. granulosus s.l.* complex, while  
73 others are retained as genotypes within some of these species. Thus, *E. granulosus sensu stricto*  
74 (*s.s.*) is composed of genotypes G1 and G3, while G2 is no longer considered a distinct genotype  
75 (10). In addition, the G1-G3 cluster includes other closely related haplotypes, which – depending  
76 on the definition – may or may not belong to these genotypes. These are named G<sub>x</sub> in this study.

77 *E. granulosus s.s.* is mainly associated with sheep as its intermediate host and causes the largest  
78 number of human cases worldwide. Second, *E. equinus* (formerly genotype G4) is associated  
79 with horses and rarely, if ever, causes human disease. Third, *E. ortleppi* (formerly genotype G5),  
80 associated with cattle, seems to be of low pathogenicity to humans, while, fourth, *E. canadensis*  
81 (composed of genotypes G6, G7, G8 and G10) is mainly associated with cervids, camels, goats  
82 and pigs and causes the second largest number of human patients; it may have to be subdivided  
83 into two or more species and is best referred to as ‘*E. canadensis*-cluster’. Lastly, *E. felidis*  
84 (formerly ‘lion strain’) is a wildlife parasite from sub-Saharan Africa, which seems to be present  
85 only where lions still exist; no human cases have been reported so far. Apart from these five  
86 species, a yet unnamed taxon (G-Omo), related to, but not belonging to the G1-3 cluster of *E.*  
87 *granulosus s.s.*, has been described from a human patient in southern Ethiopia (4, 11-15).

88  
89 Accurate identification and reporting to the species level within *E. granulosus s.l.* is critical to  
90 prevent or control parasite spread and further accidental ingestion by humans. With possible  
91 exception of *E. felidis*, all species / genotypes are zoonotic and can cause serious CE in humans,  
92 who act as aberrant, dead-end intermediate hosts. Identifying the individual species within *E.*  
93 *granulosus s.l.* is also necessary for detailed epidemiological understanding of the disease in its  
94 geographic distribution, for surveillance purposes, and ultimately for implementing effective  
95 prevention and control measures. This is particularly important in endemic areas, where several  
96 *Echinococcus* species and other taeniid cestodes coexist. This differentiation is also important to  
97 assess the different zoonotic potential of the various species (16) in intermediate and aberrant  
98 hosts at risk (16, 17). According to a recent expert consensus, specific differentiation of the *E.*  
99 *granulosus s.l.* complex should be done with any kind of sample whenever technically feasible  
100 (1).

101  
102 Methods used for the diagnosis of *Echinococcus* infections in definitive and intermediate hosts  
103 include classical parasitological techniques such as microscopic examination of intestinal  
104 scrapings, counting procedures and sedimentation and flotation of faecal samples (18-22) as well  
105 as molecular techniques such as polymerase chain reaction [PCR] which are particularly useful  
106 for species or genotype differentiation (16, 17). The traditional parasitological methods are  
107 important for the preparation and pre-selection of sample material, but generally do not provide  
108 sufficient acuity for species differentiation. Several PCR protocols for detection and  
109 differentiation of species within *E. granulosus s.l.* have been published (23-26). However, most  
110 of these protocols are based on conventional PCR techniques and either require an additional  
111 sequencing step for unambiguous determination, or are limited to certain *Echinococcus* species,  
112 taxa or genotypes. Therefore, a tool for simultaneous testing for and typing of species within *E.*  
113 *granulosus s.l.* in a parallel manner would be a helpful addition to the diagnostic toolbox. Such a  
114 tool would enable reliable, simple, fast and affordable diagnosis to the species level (*E.*  
115 *granulosus s.s.*, *E. equinus*, *E. ortleppi* [G5]) and *E. canadensis*).

116  
117 Here we show that sequence-specific DNA probe-based quantitative PCR [qPCR] amplification  
118 of polymorphic target regions can be used as a single-step diagnostic tool for the differentiation  
119 of the four most important *Echinococcus* species that cause cystic echinococcosis. Diagnostic  
120 DNA probe qPCR tests were successfully applied, also together with an internal control in duplex  
121 or triplex format to identify the single species derived from cystic material or faecal matter. We  
122 anticipate that this tool will not only make diagnosis easier and faster, but would also be of use  
123 for epidemiological studies, effective prevention planning and control programs (16, 17).

124

## 125 **Materials and Methods**

### 126 Primer and DNA probe design for qPCRs

127 For a bioinformatic prediction of suitable regions in the mitochondrial genome of *Echinococcus*  
128 spp., relevant sequences were downloaded from the public NCBI database at  
129 <https://www.ncbi.nlm.nih.gov/nucleotide/>. Accession numbers are listed in Table 1 and sequence  
130 analysis is summarised in Figure 1. Mitochondrial genomes were aligned using the “MAFFT”  
131 algorithm embedded in the Geneious Prime<sup>®</sup> (Version 2019.2.3) software suite. The program was  
132 used with default settings, whereby selection of the appropriate algorithm for the alignment was  
133 set to automatic. The Primer 3 algorithm, embedded in Geneious Prime<sup>®</sup>, was then applied to all  
134 aligned sequences to predict potential targets for qPCR-based diagnosis. Thereafter, the *in silico*  
135 predicted qPCR targets were further analysed to find suitable polymorphic regions that might  
136 allow differentiating *E. granulosus s.l.* species of interest from others within the *E. granulosus*  
137 *s.l.* complex. To validate selected primer sequences *in vitro*, their performance was assessed in a  
138 SYBR<sup>®</sup> Green qPCR assay as described below.

139

### 140 Reference DNA samples and faecal spiking

141 To develop and validate the qPCR, we utilised a panel of reference DNA samples from members  
142 of the *E. granulosus s.l.* complex and related cestode species as outgroup controls. We included  
143 *E. granulosus s.s.* (G1-3), *E. equinus* (G4), *E. ortleppi* (G5) and genotypes of the *E. canadensis*  
144 cluster (G6, G7, G8 and G10) (Table 2). To verify the identity of the taxa in the reference  
145 material, we genotyped all DNA samples by conventional PCR (Figure 2) as described in this  
146 manuscript and shipped the obtained amplicons to Eurofins Genomics (Ebersberg, Germany) for  
147 Sanger sequencing. To minimise the cross-contamination risk among reference samples, the  
148 DNA quantity was reduced by diluting samples 1:100. These dilutions were used as working

149 samples in all experiments. To test the analytical sensitivity and efficiency of the TaqMan<sup>®</sup> qPCR  
150 assays, DNA samples were further diluted in ten-fold steps up to 1:10<sup>-7</sup> in Tris-EDTA buffer with  
151 2 µg/µl Bovine Serum Albumin [BSA] (Carl Roth, Karlsruhe, Germany) (27). As faecal matter is  
152 known to contain PCR inhibitory components (28), spiked faecal samples from a confirmed *E.*  
153 *multilocularis*-free red fox (*Vulpes vulpes*) were prepared. To test whether *E. granulosus s.l.*  
154 species could be differentiated in DNA samples extracted from faecal samples, 200 mg of faeces  
155 were spiked with reference DNA that had been serially diluted in ten-fold steps up to 1:10<sup>-4</sup>. Each  
156 sample was prepared in duplicate. Spiked faecal samples were then processed using the ZR  
157 Faecal DNA MiniPrep<sup>™</sup> kit (Zymo Research, Freiburg, Germany) to carry out DNA extraction  
158 as recommended in the kit manual.

159

#### 160 Conventional PCR

161 To confirm the identity of the respective *Echinococcus* spp. in reference DNA samples,  
162 conventional PCR was performed as described (23, 28). In brief, the following primers were used  
163 to amplify *E. multilocularis* DNA sequences (H15 F [5-CCATATTACAACAATATTCCTATC-  
164 3], EM-H17 R[5-GTGAGTGATTCTTGTTAGGGGAAG-3]), *E. granulosus s.l.* DNA (Cest4  
165 F[5-GTTTTTGTGTGTTACATTAATAAGGGTG-3], Cest5 R[5-  
166 GCGGTGTGTACMTGAGCTAAAC-3]) and *Taenia* spp. DNA (Cest3 F[5-  
167 YGAYTCTTTTTAGGGGAAGGTGTG-3], Cest5 R[5-GCGGTGTGTACMTGAGCTAAAC-3])  
168 (23, 29). PCR was performed in a total volume of 25 µl per sample with 2.5 µl 10x PCR Rxn  
169 Buffer (Invitrogen Platinum<sup>®</sup>Taq Polymerase, Invitrogen GmbH, Darmstadt, Germany), 100  
170 pmol/µl of each primer (synthesized at Eurofins Genomics, Ebersberg, Germany), 12.5 mM  
171 dNTPs, 50 mM MgCl<sub>2</sub> (Invitrogen Platinum<sup>®</sup>Taq Polymerase), 5 U/µl Taq Polymerase  
172 (Invitrogen Platinum<sup>®</sup>Taq Polymerase, Qty. 300 Rxn) and 2.5 µl DNA template. The PCR was



173 performed in a Bio-Rad C1000 Thermal Cycler Detection System (Hercules, Bio-Rad  
174 Laboratories GmbH, Munich, Germany) applying the following cycle: 94 °C for 3 min, thereafter  
175 40 cycles with 94 °C for 30 s, 55 °C for 30 s and 72 °C for 60 s. PCR products were separated by  
176 agarose gel electrophoresis in 2 % gels (Biozym<sup>®</sup> LE Agarose, Hessisch Oldendorf, Germany)  
177 with 0.2 % ethidium bromide.

178

#### 179 Generic quantitative PCR (SYBR<sup>®</sup> Green)

180 To test the specificity of *in silico* selected primers, a generic quantitative PCR was carried out  
181 with a panel of reference DNAs. Primer and probes were obtained from Metabion (Planegg,  
182 Germany) (Table 2). The SYBR<sup>®</sup> Green qPCR was performed in a total volume of 20 µl. For the  
183 PCR reaction mixture, 10 µl SsoAdvanced universal SYBR<sup>®</sup> Green supermix (2x) (Biorad  
184 Laboratories GmbH, Munich, Germany), 10 pmol of each primer (forward and reverse), ultrapure  
185 nuclease-free water (Sigma-Aldrich, Missouri, USA) and 5 µl of template DNA were used. The  
186 cycling conditions in the SYBR<sup>®</sup> Green real-time PCR were 98.0 °C (3 min, activating of Taq  
187 polymerase), followed by 40 cycles at 95.0 °C for 15 s and at 60.0 °C for 30 s. After each cycle,  
188 the light emitted by the fluorophore was measured. The melting curve was constructed from 65  
189 °C to 95 °C at 0.5 °C increments with a dwell time of 5 s at each temperature. Real-time PCR  
190 results were analysed using the CFX Maestro software suite (Version: 3.1.15; Biorad  
191 Laboratories GmbH, Munich, Germany).

192

#### 193 Sequence-specific DNA probe based quantitative PCR (TaqMan<sup>®</sup>) and internal control

194 TaqMan<sup>®</sup> qPCR was performed as previously described (28, 30). In brief, the total reaction  
195 volume of 25 µl per sample included 12.5 µl TaqMan<sup>®</sup> qPCR master mix (QuantiTect<sup>®</sup> Multiplex  
196 PCR NoROX Kit (QIAGEN, Hilden, Germany), 1.25 µl of the respective primer/probe mix

197 (Table 2) (200 nM of each primer (forward and reverse) together with 200 nM hydrolysis probe),  
198 6.25 µl ultrapure nuclease-free water (Sigma-Aldrich, Missouri, USA) and 5 µl DNA template.  
199 Primers and probes were obtained from Eurofins Genomics (Ebersberg, Germany). The qPCR  
200 was carried out in a Bio-Rad CFX 96 Real-Time Detection System (Hercules, Bio-Rad  
201 Laboratories GmbH, Munich, Germany) using the following thermal profile: 50 °C for 2 min, an  
202 initial denaturation step at 95 °C for 15 min and 45 amplification cycles of 94 °C for 60 s  
203 followed by annealing and elongation at 59 °C for 1 min. When the reference DNA-spiked faecal  
204 samples were analysed by TaqMan<sup>®</sup> qPCR, a known quantity of heterologous plasmid DNA  
205 containing the enhanced green fluorescent protein [EGFP] gene (31) was included as an internal  
206 control [IC] in the qPCR mixture to detect potential inhibition. IC plasmids were added to each  
207 TaqMan<sup>®</sup> qPCR reaction mix along with the primers EGFP1-F, EGFP1-R and the probe EGFP1  
208 (Table 2). The amount of the IC DNA added to each reaction was adjusted to result in a Cq value  
209 of about 30 in the respective qPCR tests. Each sample was tested by adding 12.5 µl QuantiTect<sup>®</sup>  
210 Multiplex PCR NoROX Kit (200 × 50 µl reactions, QIAGEN, Hilden, Germany), 1 µl IC-DNA,  
211 1.25 µl of the respective primer/probe mix to detect *Echinococcus* spp. DNA, 0.3 µl EGFP  
212 primer/probe mix and 4.95 µl ultrapure nuclease-free water (Sigma-Aldrich, Missouri, USA).  
213 Due to a cross-reaction of the G6\_10\_qPCR primers with *E. ortleppi* (G5) DNA, this qPCR  
214 reaction had to be modified into a duplex format by combining it with G5\_qPCR primers and  
215 probe. This duplex assay was further combined with the EGFP-PCR in a triplex format to test  
216 DNA samples extracted from faecal samples. The concentrations of the corresponding primers  
217 and probes are shown in the Table 2. Reactions were run in a total volume of 25 µl, which  
218 included 5 µl template DNA extracted from faecal samples. The duplex and triplex TaqMan<sup>®</sup>  
219 qPCRs were also carried out in the Bio-Rad CFX 96 Real-Time Detection System (Hercules,  
220 Bio-Rad Laboratories GmbH, Munich, Germany), using the same thermal program as described

221 above. Emitted fluorescence was measured at the end of every cycle. A negative extraction  
222 control that had been used in parallel throughout the DNA extraction process, a negative PCR  
223 control sample (sterile deionized water) and a positive control were included in all qPCR runs.

224

#### 225 Sequencing of qPCR products

226 To verify qPCR amplicon sequences, purified amplicons from each single-plex TaqMan<sup>®</sup> qPCR  
227 were cloned into a plasmid vector using the pGEM<sup>®</sup>-T Easy Vector System I kit (Cat.# A1360,  
228 Promega, Walldorf, Germany) and One Shot<sup>®</sup> TOP10 (Thermo Fisher Scientific, Waltham, MA,  
229 USA)) chemically competent *Escherichia coli* according to the manufacturer's instructions. Each  
230 plasmid vector DNA was then extracted from cultivated *E. coli* with the QIAprep Spin Miniprep  
231 Kit (QIAGEN, Hilden, Germany) according to the manufacturer's instructions and subsequently  
232 sequenced using the BigDye Terminator v1.1 Cycle Sequencing Kit and an ABI 3130 capillary  
233 sequencer (Thermo Fisher Scientific, Langenselbold, Germany). Sequences were aligned and  
234 assembled with the Geneious Prime<sup>®</sup> (2019.2.3) software package. The concentration of plasmid  
235 DNA containing the respective qPCR-specific products was determined by the Nanodrop  
236 technology (Thermo Fisher Scientific, Waltham, MA, USA)). The plasmid DNA copy number  
237 was estimated using an online tool (Plasmid DNA copy calculator;  
238 [https://www.thermofisher.com/de/en/home/brands/thermo-scientific/molecular-](https://www.thermofisher.com/de/en/home/brands/thermo-scientific/molecular-biology/molecular-biology-learning-center/molecular-biology-resource-library/thermo-scientific-web-tools/dna-copy-number-calculator.html)  
239 [biology/molecular-biology-learning-cent](https://www.thermofisher.com/de/en/home/brands/thermo-scientific/molecular-biology/molecular-biology-learning-center/molecular-biology-resource-library/thermo-scientific-web-tools/dna-copy-number-calculator.html) [er/molecular-biology-resource-library/thermo-](https://www.thermofisher.com/de/en/home/brands/thermo-scientific/molecular-biology/molecular-biology-learning-center/molecular-biology-resource-library/thermo-scientific-web-tools/dna-copy-number-calculator.html)  
240 [scientific-web-tools/dna-copy-number-calculator.html](https://www.thermofisher.com/de/en/home/brands/thermo-scientific/molecular-biology/molecular-biology-learning-center/molecular-biology-resource-library/thermo-scientific-web-tools/dna-copy-number-calculator.html)).

241

242 **Results**

243

244 Primer selection for the amplification of *E. granulosus* s. l. species sequences

245

246 To design PCR primers and TaqMan<sup>®</sup> PCR probes that allow diagnostic differentiation between  
247 the targeted species, mitochondrial genome sequences were bioinformatically analysed (Figure  
248 1). The mitochondrial genomes of species and intraspecific genotypes from the *E. granulosus* s. l.  
249 complex were screened for polymorphic regions that could be used as targets for specific PCR  
250 primer pairs and corresponding probes. Identified regions and verified primers and probes for all  
251 four species, *E. granulosus* s.s. (G1-G3), *E. equinus* (G4), *E. ortleppi* (G5), and *E. canadensis*  
252 (G6-10), are shown in Table 1 and Figure 1.

253

254 We used reference samples of known tapeworm species and genotypes to test the newly  
255 identified primer pairs and probes. To ensure the identity of the reference material, tapeworm  
256 specific DNA was amplified by conventional PCR and the resulting amplicons were then  
257 analysed by Sanger sequencing. The conventional PCR and sequencing results confirmed the  
258 identity of the DNA reference samples in all cases (Figure 2, sequencing results not shown).

259

260 The bioinformatically selected primer pairs were then examined by SYBR<sup>®</sup> green qPCR to test if  
261 they specifically amplified sequences from the genome of the targeted species. We found that the  
262 selected primer pairs for *E. granulosus* s. s. (G1-G3) and *E. equinus* (G4) specifically amplified  
263 their respective reference DNA and generated amplicons that were distinguishable by their  
264 melting peak temperatures from amplicons generated using samples with DNA from closely  
265 related *Echinococcus* spp. and *Taenia* spp. (Figure 3A and B). Furthermore, with the *E.*

266 *granulosus s.s.* (G1-G3) primers, the melting temperature of 81 °C was distinguishable from the  
267 melting temperatures observed in amplicons generated with the same primer pair in reference  
268 samples of *E. equinus* (G4), *E. ortleppi* (G5) and *E. canadensis* (G6-10) at 79-80 °C (Figure 3A).  
269 The selected primer pair designed for *E. equinus* (G4) generated a specific PCR product and did  
270 not cross-react with samples of the other *E. granulosus s.l.* species or *E. multilocularis* (Figure  
271 3B, Table 3).

272  
273 By contrast, primers designed to amplify sequences of *E. ortleppi* (G5), targeting a polymorphic  
274 sequence in *Nad5*, also yielded non-specific PCR products in the *E. canadensis* (G6-10) reference  
275 samples and vice versa, i.e. primers designed to generate *E. canadensis* (G6-10) amplicons from  
276 *Cox3* amplified also *E. ortleppi* (G5) reference DNA. Whilst the selected primer pairs amplified  
277 PCR products in *E. granulosus* DNA samples, the resulting melting curves of all of the products  
278 were hardly distinguishable at the observed temperatures of 78 °C to 78.5 °C for *E. canadensis*  
279 (G6-10) and 79 °C for *E. ortleppi* (G5) (Figure 3C and D). Nevertheless, the primers were  
280 selected for further testing in the TaqMan qPCR with their corresponding probes.

281  
282 Additional primer and probe combinations that were initially selected *in silico*, but did not  
283 satisfactorily amplify sequences from the targeted species during SYBR<sup>®</sup> green, or in further  
284 TaqMan<sup>®</sup> qPCR experiments, are shown in the supplementary Table S1.

285  
286 In summary, amplicon generating primer pairs were identified for all targeted species (Table 1).  
287 Conventional SYBR<sup>®</sup> green qPCR was sufficient to differentiate *E. granulosus s. s.* (G1-G3) and  
288 *E. equinus* (G4) using primers targeting polymorphic regions in *Cox1* (Table 1) based on the  
289 generated amplicon alone. Using the same method, primers targeting regions in *Nad5* in *E.*

290 *ortleppi* (G5) and in *Cox3* in *E. canadensis* (G6-8, G10) amplified successfully, but cross-reacted  
291 and required additional testing to separate the respective genotypes.

292

### 293 Detection of *Echinococcus* species by TaqMan<sup>®</sup> quantitative PCRs

294

295 To increase the specificity of *Echinococcus* spp. target DNA detection, the four selected primer  
296 pairs were combined with amplicon-specific TaqMan<sup>®</sup> DNA probes (Table 1), and used to  
297 analyse serially diluted DNA reference samples (Figure 4). TaqMan<sup>®</sup> qPCR assays for *E.*  
298 *granulosus* s. s. (G1-G3) and *E. equinus* (G4) specifically identified target DNA in the  
299 corresponding reference samples. The selected probes for both subgroups did not bind DNA from  
300 the other *E. granulosus* s.l. species, from *E. multilocularis* spp. or from *Taenia* spp. (Table 3).  
301 Primers and probe for detecting *E. granulosus* s.s. (G1-G3) also amplified DNA from the G<sub>x</sub>,  
302 strain sample, indicating that the assay is also applicable to other genotypes of *E. granulosus* s.s..

303

304 Addition of TaqMan<sup>®</sup> probes to qPCR reactions with selected G5\_qPCR primer pairs for *E.*  
305 *ortleppi* (G5) also showed specific amplification of the DNA target region. No cross- reactions  
306 were recorded with DNA samples from the remaining *Echinococcus* spp. and *Taenia* spp. (Table  
307 3). Thus, it appears that the addition of sequence-specific DNA probes ameliorated the cross-  
308 reactivity with the *E. canadensis* cluster observed in the qPCR system.

309

310 TaqMan<sup>®</sup> qPCR with the G6\_G10\_qPCR primer set targeting the *E. canadensis* (G6-8, G10)  
311 cluster resulted in amplification of a probe-binding PCR product (Figure 4C and D). However,  
312 this assay also cross-reacted with the *E. ortleppi* (G5) DNA sample and thus did not allow  
313 differentiation of these two species (Table 3). To distinguish *E. canadensis* (G6-8, G10) from G5

314 samples, we combined the G5\_qPCR with the G6\_G10\_qPCR primer pairs and probes in a  
315 TaqMan<sup>®</sup> qPCR (G5\_G10\_qPCR) duplex format. With this format only the probe-binding  
316 product for *E. canadensis* (G6-8, G10) would be amplified and detected if *E. canadensis* was  
317 present in the diagnostic sample. Whereas, if *E. ortleppi* (G5) were present in the diagnostic  
318 sample, the probe-binding products for both *E. ortleppi* (G5) and *E. canadensis* (G6-8, G10)  
319 genotypes would be detected, as the primer and probe for *E. canadensis* (G6-8, G10) also  
320 amplified and detected *E. ortleppi* (G5). Therefore, the duplex TaqMan<sup>®</sup> qPCR format of  
321 G5\_G10\_qPCR primer and probes allowed diagnostic differentiation of *E. ortleppi* (G5) from the  
322 *E. canadensis* (G6-8, G10) cluster (Table 3).

323  
324 To characterise the diagnostic TaqMan<sup>®</sup> qPCR assays further, the analytical sensitivity and  
325 efficiency of the qPCR reactions for each subgroup were determined by testing DNA extracted  
326 from clinical samples as cloned PCR products (plasmid DNA) (Table 4, Figure 4 and Figure 5).  
327 The efficiency of TaqMan<sup>®</sup> qPCR assays varied between 93 % and 106.7%. The analytical  
328 sensitivity or limit of detection of the assays varied between 0.6 and 1.4 copies/ $\mu$ l (Table 4). The  
329 specificity in G1\_3\_qPCR, G4\_qPCR and G5\_qPCR was 100 %. G6\_10\_qPCR cross-reacted  
330 with *E. ortleppi* (G5) samples (Table 3) and required a duplex assay design with G5\_qPCR for  
331 diagnostic purposes.

332  
333 In summary, sequence-specific DNA probe-based TaqMan<sup>®</sup> qPCR assays were established that  
334 identified four species within *E. granulosus s.l.* in reference samples. These samples were further  
335 differentiated from other *Echinococcus* and *Taenia* species. (Table 3).

336  
337 Detection of *E. granulosus s.l.* species in faecal samples

338  
339 The reference DNA samples used in this study for the development of qPCR assays that  
340 differentiate four *Echinococcus* species was derived from cyst wall material of metacestodes  
341 isolated from infected hosts. While cysts may serve as a sample matrix for the detection of *E.*  
342 *granulosus s.l.* species, it is diagnostically relevant that the assays also amplify target DNA  
343 extracted from other relevant matrices such as faecal matter. To test the performance of the  
344 TaqMan<sup>®</sup> qPCR assays when used with faecal samples, fox faeces were spiked with serially  
345 diluted reference DNA to simulate the testing of faeces from definitive hosts infected with  
346 members of *E. granulosus s.l.*. A known quantity of standardised, heterologous plasmid DNA  
347 with matching primers and probe was included as an internal control [IC] in the qPCR mixture  
348 (31) to control for PCR inhibition by faecal factors. Inclusion of the IC also allowed testing the  
349 assays in duplex (G1\_3\_qPCR or G4\_qPCR in combination with IC-qPCR) and triplex  
350 (G5\_G10\_qPCR and IC-qPCR) TaqMan<sup>®</sup> qPCR formats (see Table 1). All four assays targeting  
351 *E. granulosus s.s.* (G1-G3), *E. equinus* (G4), *E. ortleppi* (G5) and *E. canadensis* (G6-8, G10)  
352 respectively, amplified the specific tapeworm DNA region from each analysed faecal sample type  
353 (Table 5). Combining *E. ortleppi*, *E. canadensis* as well as IC primers and respective probes in a  
354 triplex qPCR differentiated *E. ortleppi* (G5) and *E. canadensis* (G6-8, G10) DNA in faecal  
355 samples (Table 5). Probe recognition of IC DNA and quantification showed that no inhibition of  
356 the amplification process had occurred in these faecal samples and that the selected primer probe  
357 mixtures performed reliably with samples prepared in a matrix of faecal matter under duplex or  
358 triplex qPCR conditions. The Cq values generated from the re-extracted tapeworm DNA from  
359 faeces were much higher than those from the non-faecal control samples i.e. DNA extracted from  
360 hydatid cyst material. This suggests that the quantities of re-extracted tapeworm DNA from



361 faeces were much lower than from non-faecal control samples, possibly due to loss of DNA  
362 during the faecal DNA extraction process (Table 5).

363 Taken together, we developed four sequence specific-DNA probe-based qPCR assays that allow  
364 differentiation of *E. granulosus s.l.* species detected in DNA samples derived from cyst material  
365 or spiked faecal matter, namely *E. granulosus s.s.* (G1-G3), *E. equinus* (G4), *E. ortleppi* (G5) and  
366 *E. canadensis* (G6-8, G10).

367

368 **Discussion**

369  
370 Cystic echinococcosis is a globally important parasitic zoonosis that requires well-informed  
371 prevention and control measures based on reliable and efficient diagnosis of the various causative  
372 agents (32, 33).

373  
374 By designing TaqMan<sup>®</sup>-qPCR-probes that directly identify polymorphic genome regions among  
375 the four most important species of the *E. granulosus s.l.* complex, we simplify and enhance  
376 current diagnostic procedures in multiple ways. The advantages include increased sensitivity,  
377 increased specificity, the ability to quantify sample DNA, reduced time-cost to achieve a  
378 diagnostic result and potentially reduced processing and equipment costs due to focussing on a  
379 single technology. Taken together, these methodological properties should significantly facilitate  
380 the process of establishing diagnostic capacities for the detection of *E. granulosus s.l.* in field  
381 laboratory settings and also facilitate higher sample throughput for epidemiological studies (25,  
382 26).

383  
384 We discriminate the individual CE agents diagnostically by targeting genetic variability of the  
385 mitochondrial genome. Using a bioinformatics approach, we first identified polymorphic regions  
386 in the genes *Cox1*, *Cox3* and *Nad5* (Figure 1), which have previously emerged as suitable targets  
387 for *E. granulosus s.l.* genotyping (11, 34). Selected primer-probe combinations for all but one  
388 species were specific, as the single-plex qPCR system for *E. canadensis* (G6-8, G10) cross-  
389 reacted with *E. ortleppi* (G5) samples (Table 3). One obvious possible explanation is the close  
390 relationship of these species, resulting in a low degree of polymorphism between *E. ortleppi* and  
391 *E. canadensis* in the *Cox3* region targeted by G6-10 primers and probe. However, the non-

392 specific G6-10-TaqMan<sup>®</sup>-probe directed at *Cox3* differed from its corresponding G5 sequence by  
393 four nucleotides (G>A, G>A, C>T, C>T), whereas the specific G5-*Nad5*-probe differed only by  
394 three nucleotides when compared to its corresponding G6-10-sequence (C>T, C>T, G>A)  
395 (Figure 1). Therefore, it appears that nucleotide polymorphism alone is not sufficient to  
396 determine probe specificity in this context and that other single stranded DNA-affinity  
397 mechanisms, such as steric nucleotide relations (35), interact to overcome the mismatching  
398 probe-sequence in the G6-10 qPCR system. Our cross-reactivity observations are also consistent  
399 with genome phylogeny studies demonstrating a close relationship between *E. ortleppi* and *E.*  
400 *canadensis* (4, 13). Born from necessity, we therefore developed a duplex qPCR format, which  
401 now enabled successful G5 and G6-10 diagnosis for both samples in a single, parallel step, thus  
402 highlighting the value of multiplex qPCR diagnosis for *Echinococcus* species in the future.

403  
404 Whilst phylogenetic relationship may contribute to diagnostic cross-reactivity, testing of *E.*  
405 *granulosus s.s.* haplotypes, which do not precisely fit with sequences of G1 and G3, but clearly  
406 belong to that species (here named G<sub>x</sub>), showed that our assay correctly classified a “non-  
407 conventional” echinococcal isolate (Figure 2). Phylogenetic studies of *E. granulosus s.s.* isolates  
408 found that a large proportion of the identified haplotypes were not homologous with G1 and G3  
409 in the classical sense of the G-nomenclature, yet they clearly belonged to the *E. granulosus s.s.*  
410 cluster (4, 13). Here, we classify the G<sub>x</sub>-isolate that could not be assigned to the conventional G1-  
411 3 genotypes previously (4, 13) as *E. granulosus s.s.*, which indicates a broad applicability of the  
412 G1\_3\_qPCR assay in the context of the natural genetic diversity in this subgroup (for an  
413 alternative interpretation of genotypes G1 and G3 see (10)).

414

415 The described qPCR system includes all species and genotypes of *E. granulosus s.l.* except *E.*  
416 *felidis*. However, this species, which is not known to be zoonotic, has a very fragmented  
417 distribution range in sub-Saharan Africa as it apparently depends on the presence of its principle  
418 definitive host, the lion. In any case, the genetic structure of African echinococcosis seems to be  
419 more complex than that found elsewhere and is in need of further research. This is illustrated by  
420 the presence of a highly divergent zoonotic genotype, G-Omo, in north-eastern Africa. This  
421 genotype was only tentatively retained in *E. granulosus s.s.* pending further epidemiological  
422 information (6). Interestingly, DNA of G-Omo did not react in the *E. granulosus s.s.* qPCR (as *E.*  
423 *felidis*, which belongs to the same species cluster), which supports a separate identity of this  
424 taxon. Likewise, *E. canadensis* may in future have to be split in two species, namely the wildlife  
425 transmitted G8 and G10, and the largely domestically transmitted G6/7 genotype group(36). This  
426 will not diminish the value of the qPCR, as both genotype cluster are allopatrically distributed  
427 and occur in very different epidemiological settings, with only a limited area of possible overlap  
428 in the Asian part of the Russian Federation (6).

429  
430 The TaqMan<sup>®</sup>-probe-based qPCR assays developed in this study show good efficiency, analytical  
431 specificity as well as methodical and diagnostic sensitivity when used with DNA obtained from  
432 cysts. Therefore, they are suitable for diagnosis of *Echinococcus* species in intermediate hosts,  
433 including humans. Our findings in spiked faecal samples suggest that the duplex qPCR should  
434 also be applicable for the detection of *E. granulosus s.l.*-egg DNA in definitive hosts. Detection  
435 and genotyping of *Echinococcus* spp. DNA in faecal samples would be particularly useful when  
436 examining larger populations of living animals in the field for epidemiological studies,. Whilst  
437 we characterised the analytical sensitivity of the assays by using cloned amplicons (Table 4,  
438 Figure 4 and Figure 5), their methodical and diagnostic sensitivity with faecal samples containing

439 parasite eggs remains to be determined. A similar standardised, cloned-amplicon-based approach  
440 could be used to quantify target DNA in sample matrix of interest when using our assays. For  
441 instance, we observed an approx. 100-fold loss of specific DNA qPCR detection in spiked faecal  
442 samples (approx. 7 Cq-values) when compared to similar DNA quantities analysed in cyst  
443 material (Table 5). Inclusion of the IC-plasmid internal control suggested that the DNA loss  
444 occurred at the extraction step, as the amplification in faecal and non-faecal samples was  
445 comparable (Table 4). This observation further showed that faecal inhibitors known to potentially  
446 interfere with PCR amplification (28), had no noticeable effect in our qPCR system. However,  
447 faecal samples from other animals could harbour another combination of the inhibitory  
448 components, which may negatively influence the amplification process of the assays (28).

449  
450 We anticipate that single-step genotyping techniques for *Echinococcus granulosus s.l.* complex  
451 diagnosis by DNA-probe-based qPCR will complement the available methods, improve case  
452 reporting on the genotype-subgroup-level, advance our knowledge on the epidemiology of these  
453 parasites and ultimately support effective control of CE.

454 **Acknowledgements**

455 We would like to thank Alrik-Markis Kunisch and Susanne Zahnow for technical assistance. We  
456 also thank Dr. Bernd Hoffmann for discussions on the study design and Dr. Johanna Dups-  
457 Bergmann for critical reading of this manuscript. Furthermore we would like to thank Hasmik  
458 Gevorgian for providing *E. granulosus s.s.* cyst material from Armenia, Yitagele Terefe for  
459 providing *E. granulosus s.s.* (Gx), *T. saginata* and *T. hydatigena* cyst material from Ethiopia,  
460 Ortwin Aschenborn for providing *E. equinus* (G4) cyst material from Namibia, Cecilia Mbae for  
461 providing *E. ortleppi* (G5) and *E. canadensis* (G6) from Kenya, Fredrick Banda for providing of  
462 *E. ortleppi* (G5) cyst material from Zambia, Sergey Konyaev for providing of *E. canadensis* (G8)  
463 cyst material from Russia, Liudmila Kokolova for providing of *E. canadensis* (G10) from Russia  
464 and Daniel Woldeyes for providing of *E. canadensis* (G8) cyst material from *E. cf. granulosus*  
465 (*G<sub>omo</sub>*) from Ethiopia. This work was supported by funding from the European Union's Horizon  
466 2020 Research and Innovation programme under grant agreement number 773830: One Health  
467 European Joint Programme (MEME project; <https://onehealthjp.eu/jrp-meme/>).

468

469 **Declaration**

470 The study described is original and is not under consideration by any other journal. All authors  
471 approved the final manuscript and its submission. The authors declare that they have no conflict  
472 of interest.

473

474 **References**

- 475 1. Vuitton DA, McManus DP, Rogan MT, Romig T, Gottstein B, Naidich A, Tuxun T, Wen  
476 H, Menezes da Silva A, World Association of E. 2020. International consensus on  
477 terminology to be used in the field of echinococcoses. *Parasite* 27:41.
- 478 2. Kern P, Ammon A, Kron M, Sinn G, Sander S, Petersen LR, Gaus W, Kern P. 2004. Risk  
479 factors for alveolar echinococcosis in humans. *Emerg Infect Dis* 10:2088-93.
- 480 3. Bristow BN, Lee S, Shafir S, Sorvillo F. 2012. Human echinococcosis mortality in the  
481 United States, 1990-2007. *PLoS Negl Trop Dis* 6:e1524.
- 482 4. Romig T, Ebi D, Wassermann M. 2015. Taxonomy and molecular epidemiology of  
483 *Echinococcus granulosus sensu lato*. *Vet Parasitol* doi:10.1016/j.vetpar.2015.07.035.
- 484 5. Tappe D, Stich A, Frosch M. 2008. Emergence of polycystic neotropical echinococcosis.  
485 *Emerg Infect Dis* 14:292-7.
- 486 6. Thompson RC. 2015. Neglected zoonotic helminths: *Hymenolepis nana*, *Echinococcus*  
487 *canadensis* and *Ancylostoma ceylanicum*. *Clin Microbiol Infect* 21:426-32.
- 488 7. Romig T, Deplazes P, Jenkins D, Giraudoux P, Massolo A, Craig PS, Wassermann M,  
489 Takahashi K, de la Rue M. 2017. Ecology and Life Cycle Patterns of *Echinococcus*  
490 Species. *Adv Parasitol* 95:213-314.
- 491 8. Thompson RC. 2017. Biology and Systematics of *Echinococcus*. *Adv Parasitol* 95:65-  
492 109.
- 493 9. Kern P, Menezes da Silva A, Akhan O, Mullhaupt B, Vizcaychipi KA, Budke C, Vuitton  
494 DA. 2017. The Echinococcoses: Diagnosis, Clinical Management and Burden of Disease.  
495 *Adv Parasitol* 96:259-369.
- 496 10. Kinkar L, Laurimae T, Sharbatkhori M, Mirhendi H, Kia EB, Ponce-Gordo F, Andresiuk  
497 V, Simsek S, Lavikainen A, Irshadullah M, Umhang G, Oudni-M'rad M, Acosta-Jamett

- 498 G, Rehbein S, Saarma U. 2017. New mitogenome and nuclear evidence on the phylogeny  
499 and taxonomy of the highly zoonotic tapeworm *Echinococcus granulosus sensu stricto*.  
500 Infect Genet Evol 52:52-58.
- 501 11. Addy F, Wassermann M, Kagendo D, Ebi D, Zeyhle E, Elmahdi IE, Umhang G, Casulli  
502 A, Harandi MF, Aschenborn O, Kern P, Mackenstedt U, Romig T. 2017. Genetic  
503 differentiation of the G6/7 cluster of *Echinococcus canadensis* based on mitochondrial  
504 marker genes. Int J Parasitol doi:10.1016/j.ijpara.2017.06.003.
- 505 12. Wassermann M, Aschenborn O, Aschenborn J, Mackenstedt U, Romig T. 2015. A  
506 sylvatic lifecycle of *Echinococcus equinus* in the Etosha National Park, Namibia. Int J  
507 Parasitol Parasites Wildl 4:97-103.
- 508 13. Nakao M, Lavikainen A, Yanagida T, Ito A. 2013. Phylogenetic systematics of the genus  
509 *Echinococcus* (Cestoda: Taeniidae). Int J Parasitol 43:1017-29.
- 510 14. Nakao M, Yanagida T, Konyaev S, Lavikainen A, Odnokurtsev VA, Zaikov VA, Ito A.  
511 2013. Mitochondrial phylogeny of the genus *Echinococcus* (Cestoda: Taeniidae) with  
512 emphasis on relationships among *Echinococcus canadensis* genotypes. Parasitology  
513 140:1625-36.
- 514 15. Nakao M, Yanagida T, Okamoto M, Knapp J, Nkouawa A, Sako Y, Ito A. 2010. State-of-  
515 the-art *Echinococcus* and *Taenia*: phylogenetic taxonomy of human-pathogenic  
516 tapeworms and its application to molecular diagnosis. Infect Genet Evol 10:444-52.
- 517 16. Craig P, Mastin A, van Kesteren F, Boufana B. 2015. *Echinococcus granulosus*:  
518 Epidemiology and state-of-the-art of diagnostics in animals. Vet Parasitol  
519 doi:10.1016/j.vetpar.2015.07.028.
- 520 17. Siles-Lucas M, Casulli A, Conraths FJ, Muller N. 2017. Laboratory Diagnosis of  
521 *Echinococcus* spp. in Human Patients and Infected Animals. Adv Parasitol 96:159-257.



- 522 18. Tackmann K, Mattis R, Conraths FJ. 2006. Detection of *Echinococcus multilocularis* in  
523 foxes: evaluation of a protocol of the intestinal scraping technique. J Vet Med B Infect  
524 Dis Vet Public Health 53:395-8.
- 525 19. Umhang G, Woronoff-Rhen N, Combes B, Boue F. 2011. Segmental sedimentation and  
526 counting technique (SSCT): an adaptable method for qualitative diagnosis of  
527 *Echinococcus multilocularis* in fox intestines. Exp Parasitol 128:57-60.
- 528 20. Eckert J. 2003. Predictive values and quality control of techniques for the diagnosis of  
529 *Echinococcus multilocularis* in definitive hosts. Acta Trop 85:157-63.
- 530 21. Conraths FJ, Deplazes P. 2015. *Echinococcus multilocularis*: Epidemiology, surveillance  
531 and state-of-the-art diagnostics from a veterinary public health perspective. Vet Parasitol  
532 pii: S0304-4017(15)00367-2.:doi: 10.1016/j.vetpar.2015.07.027.
- 533 22. Duscher G, Prosl H, Joachim A. 2005. Scraping or shaking--a comparison of methods for  
534 the quantitative determination of *Echinococcus multilocularis* in fox intestines. Parasitol  
535 Res 95:40-2.
- 536 23. Trachsel D, Deplazes P, Mathis A. 2007. Identification of taeniid eggs in the faeces from  
537 carnivores based on multiplex PCR using targets in mitochondrial DNA. Parasitology  
538 134:911-20.
- 539 24. Boubaker G, Macchiaroli N, Prada L, Cucher MA, Rosenzvit MC, Ziadinov I, Deplazes  
540 P, Saarma U, Babba H, Gottstein B, Spiliotis M. 2013. A multiplex PCR for the  
541 simultaneous detection and genotyping of the *Echinococcus granulosus* complex. PLoS  
542 Negl Trop Dis 7:e2017.
- 543 25. Knapp J, Millon L, Mouzon L, Umhang G, Raoul F, Ali ZS, Combes B, Comte S,  
544 Gbaguidi-Haore H, Grenouillet F, Giraudoux P. 2014. Real time PCR to detect the

- 545 environmental faecal contamination by *Echinococcus multilocularis* from red fox stools.  
546 Vet Parasitol 201:40-7.
- 547 26. Oines O, Isaksson M, Hagstrom A, Tavoranpanich S, Davidson RK. 2014. Laboratory  
548 assessment of sensitive molecular tools for detection of low levels of *Echinococcus*  
549 *multilocularis*-eggs in fox (*Vulpes vulpes*) faeces. Parasit Vectors 7:246.
- 550 27. Garland S, Baker A, Phillott AD, Skerratt LF. 2010. BSA reduces inhibition in a TaqMan  
551 assay for the detection of *Batrachochytrium dendrobatidis*. Dis Aquat Organ 92:113-6.
- 552 28. Maksimov P, Schares G, Press S, Frohlich A, Basso W, Herzig M, Conraths FJ. 2017.  
553 Comparison of different commercial DNA extraction kits and PCR protocols for the  
554 detection of *Echinococcus multilocularis* eggs in faecal samples from foxes. Vet Parasitol  
555 doi:10.1016/j.vetpar.2017.02.015.
- 556 29. Stieger C, Hegglin D, Schwarzenbach G, Mathis A, Deplazes P. 2002. Spatial and  
557 temporal aspects of urban transmission of *Echinococcus multilocularis*. Parasitology  
558 124:631-40.
- 559 30. Maksimov P, Isaksson M, Schares G, Romig T, Conraths FJ. 2019. Validation of PCR-  
560 based protocols for the detection of *Echinococcus multilocularis* DNA in the final host  
561 using the Intestinal Scraping Technique as a reference. Food Waterborne Parasitol  
562 15:e00044.
- 563 31. Hoffmann B, Depner K, Schirrmeier H, Beer M. 2006. A universal heterologous internal  
564 control system for duplex real-time RT-PCR assays used in a detection system for  
565 pestiviruses. J Virol Methods 136:200-9.
- 566 32. Casulli A. 2020. Recognising the substantial burden of neglected pandemics cystic and  
567 alveolar echinococcosis. Lancet Glob Health 8:e470-e471.

- 568 33. Budke CM, Deplazes P, Torgerson PR. 2006. Global socioeconomic impact of cystic  
569 echinococcosis. *Emerg Infect Dis* 12:296-303.
- 570 34. Wassermann M, Woldeyes D, Gerbi BM, Ebi D, Zeyhle E, Mackenstedt U, Petros B,  
571 Tilahun G, Kern P, Romig T. 2016. A novel zoonotic genotype related to *Echinococcus*  
572 *granulosus sensu stricto* from southern Ethiopia. *Int J Parasitol*  
573 doi:10.1016/j.ijpara.2016.04.005.
- 574 35. Lefever S, Pattyn F, Hellemans J, Vandesompele J. 2013. Single-nucleotide  
575 polymorphisms and other mismatches reduce performance of quantitative PCR assays.  
576 *Clin Chem* 59:1470-80.
- 577 36. Laurimae T, Kinkar L, Moks E, Romig T, Omer RA, Casulli A, Umhang G, Bagraade G,  
578 Irshadullah M, Sharbatkhori M, Mirhendi H, Ponce-Gordo F, Soriano SV, Varcasia A,  
579 Rostami-Nejad M, Andresiuk V, Saarma U. 2018. Molecular phylogeny based on six  
580 nuclear genes suggests that *Echinococcus granulosus sensu lato* genotypes G6/G7 and  
581 G8/G10 can be regarded as two distinct species. *Parasitology* 145:1929-1937.
- 582

583 **Figure legends**

584 **Figure 1: Location of *Echinococcus granulosus sensu lato* polymorphic genome regions**  
585 **within COX1, COX3 and NAD5 genes used for primer and probes design.**

586 *In-silico* identification of polymorphic regions in aligned mitochondrial DNA sequences to  
587 differentiate the *E. granulosus sensu lato* species *E. granulosus sensu stricto* (G1-3): **A**, *E.*  
588 *equinus* (G4): **A**, *E. ortleppi* (G5): **B** and *E. canadensis* (G6-8, G10): **C** from other *Echinococcus*  
589 spp. and *Taenia* spp. Differences between aligned sequences are highlighted by different  
590 background colours of respective nucleotides. Dots represent nucleotides identical in all aligned  
591 sequences. Dark-green bars show the positions of the respective forward primer, red bars  
592 annotate the positions of the respective probes, and light-green bars indicate the positions of the  
593 reverse primer. The name of each aligned sequence consists of NCBI nucleotide data base  
594 accession number, followed by gene name and the name of *Echinococcus* species. G: genotype

595

596 **Figure 2: Reference DNA amplification of specific PCR products of *Echinococcus***  
597 ***granulosus sensu lato*.**

598 PCR products from reference DNAs obtained from *Echinococcus granulosus sensu lato* species  
599 amplified by specific PCR (Cest4, Cest5 (Trachsel et al., 2007)). 1: *E. granulosus sensu stricto*  
600 (G1), 2: *E. granulosus s.s.* (G3 ["G2"]), 3: *E. granulosus s.s.* (G3), 4-5: *E. granulosus s.s.* (Gx),  
601 6-7: *E. equinus* (G4), 8-10: *E. ortleppi* (G5), 11-12: *E. canadensis* (G6), 13: *E. canadensis* (G7),  
602 14: *E. canadensis* (G8), 15-16: *E. canadensis* (G10), 17: *E. vogeli*, 18: *E. felidis*, 19: *E. cf.*  
603 *granulosus* (G-Omo). M: 100 base pair (bp) marker. NC: non-template control, EC: negative  
604 extraction control. PK: positive control. Blue vertical lines: Gel spliced to clean up image and for  
605 labeling purposes

606

607 **Figure 3: Quantitative SYBR<sup>®</sup> green PCR melting curves of *Echinococcus* reference DNA**  
608 **samples analysed with newly identified primer pairs.**

609 Green lines indicate peaks from targeted reference DNA. Orange lines indicate peaks from not-  
610 targeted reference DNAs. A: primer for detection of *Echinococcus granulosus sensu stricto* (G1-  
611 G3) DNA. B: primer for detection of *E. equinus* (G4) DNA. C: primer for detection of *E. ortleppi*  
612 (G5) DNA. D: Primer for detection of *E. canadensis* (G6-8,G10) DNA

613

614 **Figure 4: Fluorescence curves for developed TaqMan<sup>®</sup> qPCRs of serially diluted**  
615 ***Echinococcus* reference DNA samples.**

616 **A:** G1\_3\_qPCR: *E. granulosus s.s.*, **B:** G4\_qPCR: *E. equinus*, **C:** G5\_10\_qPCR: *E. ortleppi*, and  
617 **D:** G5\_10\_qPCR: *E. canadensis*. RFU: relative fluorescence units. Cq: quantification cycle

618

619 **Figure 5: Fluorescence curves of serially diluted specific plasmid DNA samples analysed by**  
620 **TaqMan<sup>®</sup> qPCR.**

621 **A:** G1\_3\_qPCR: *E. granulosus s.s.*, **B:** G4\_qPCR: *E. equinus*, **C:** G5\_10\_qPCR: *E. ortleppi*, and  
622 **D:** G5\_10\_qPCR: *E. canadensis*. RFU: relative fluorescence units. Cq: quantification cycle

623

624

625



A

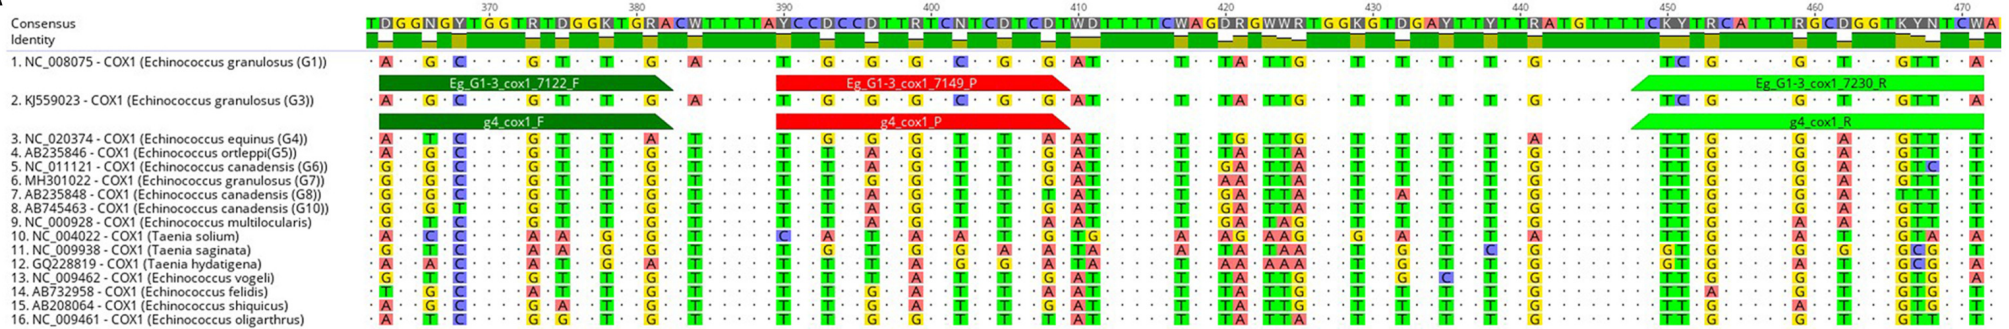

B

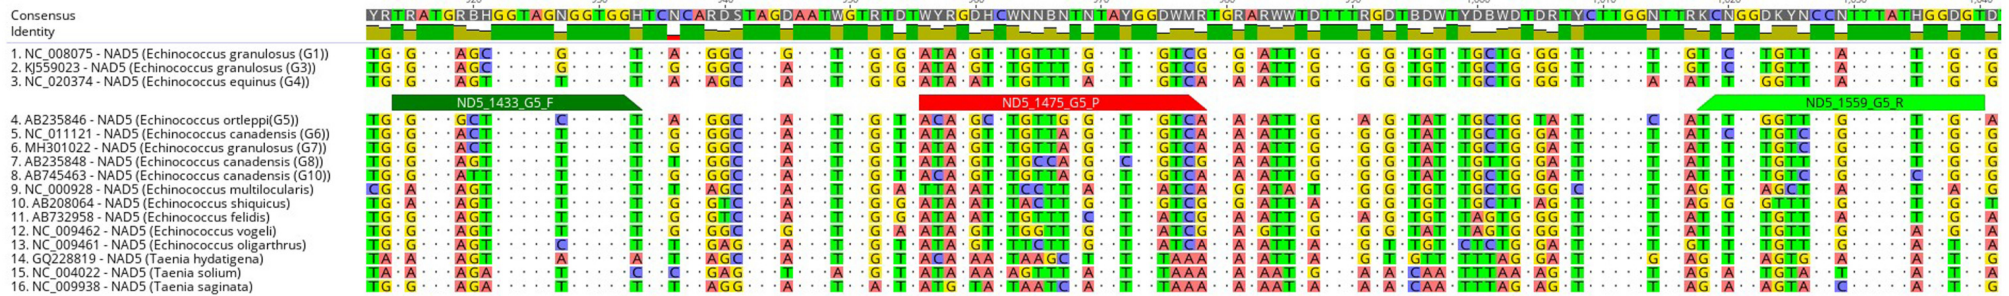

C

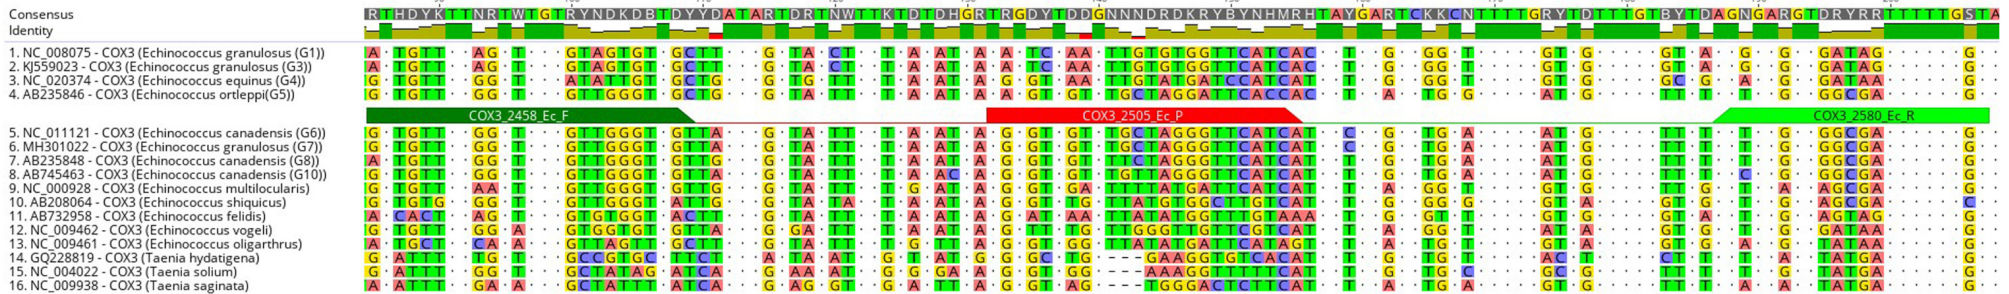

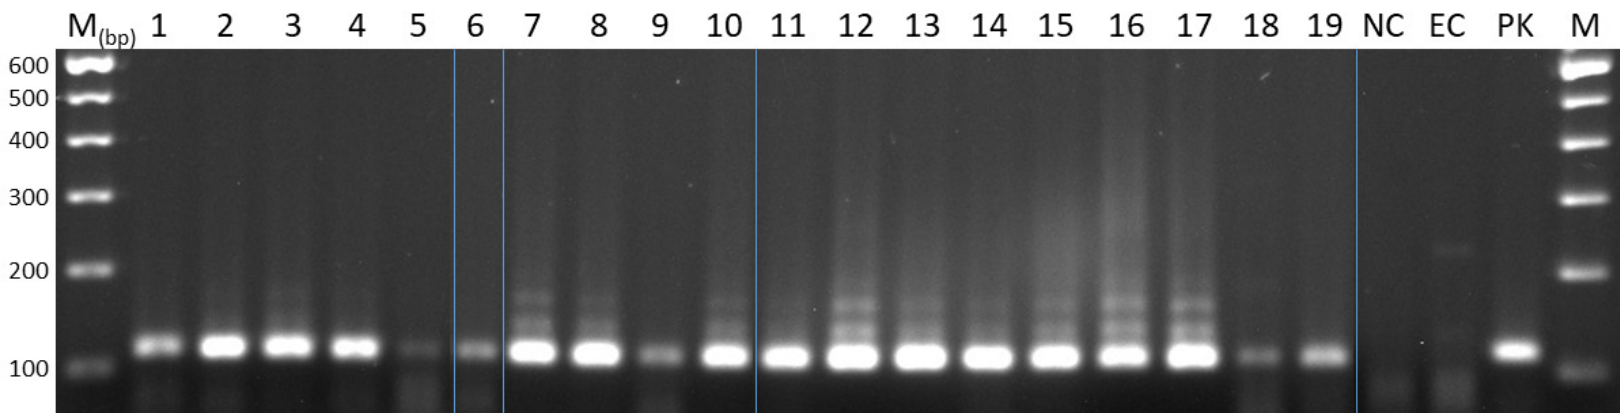



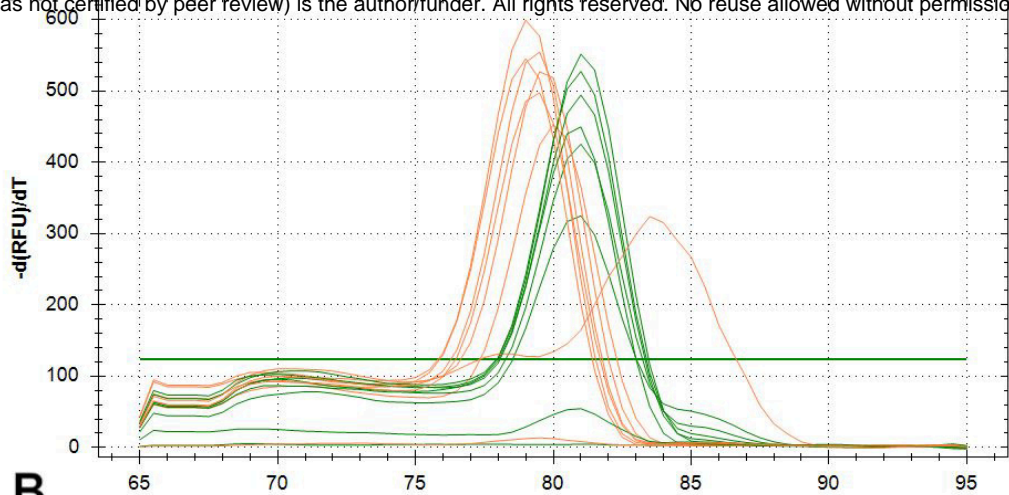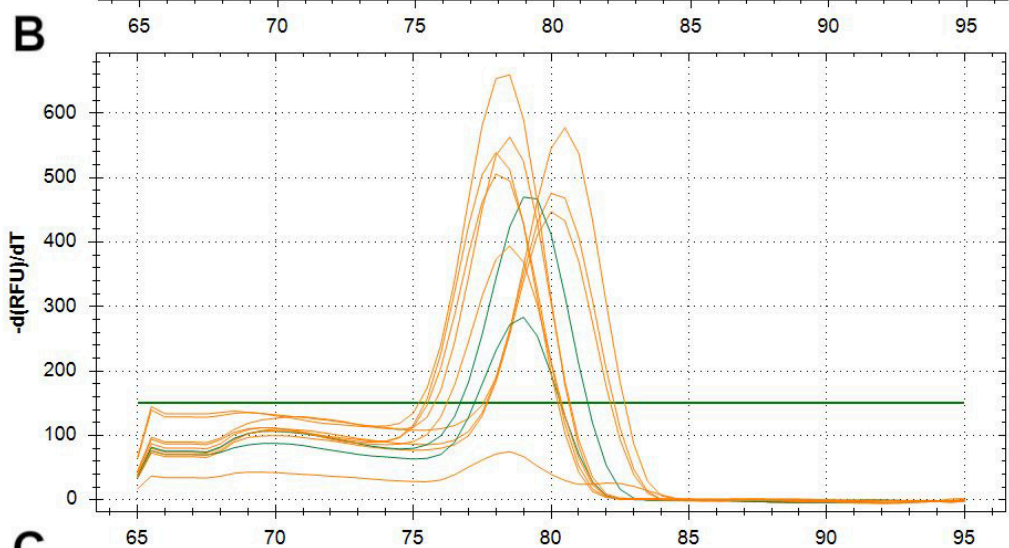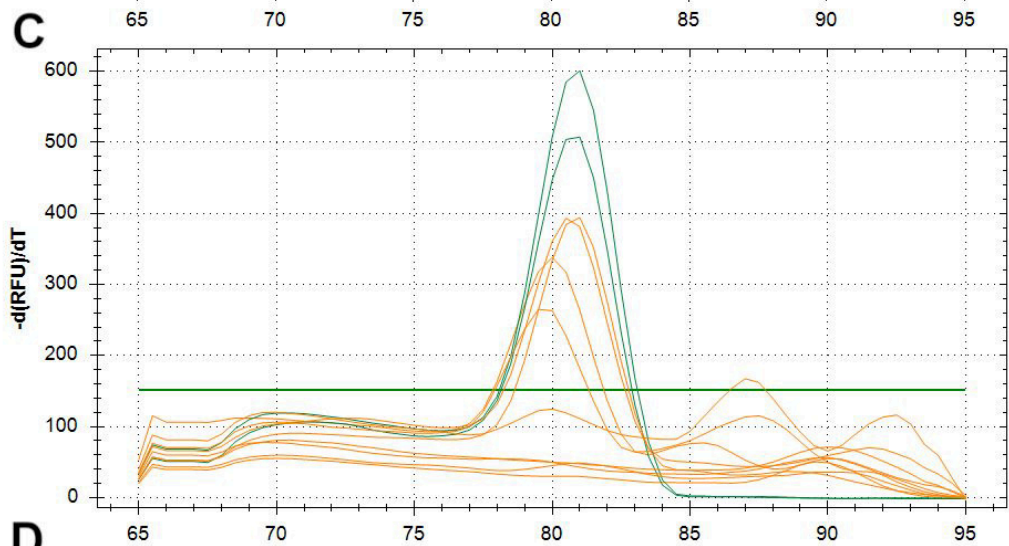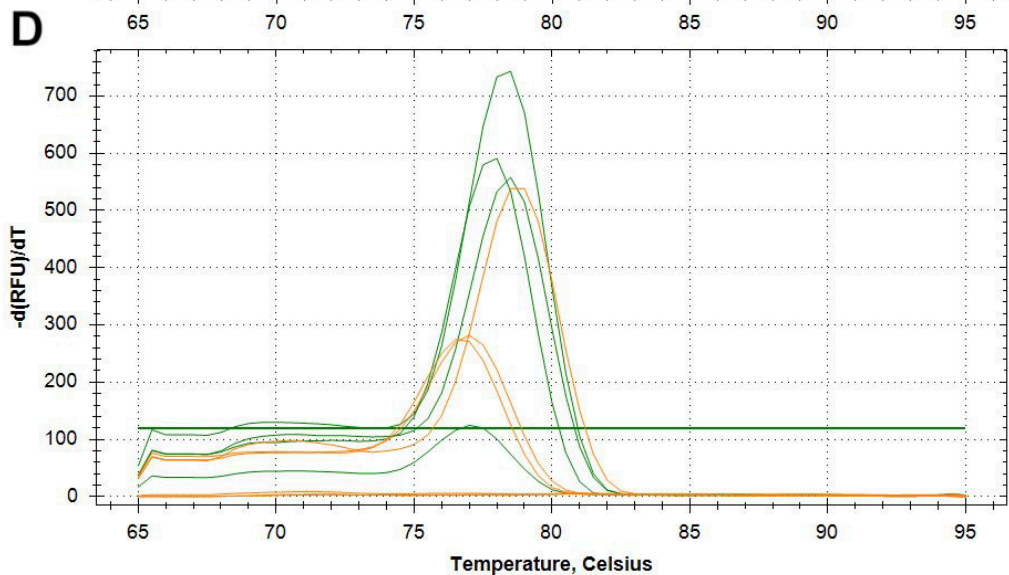



**A**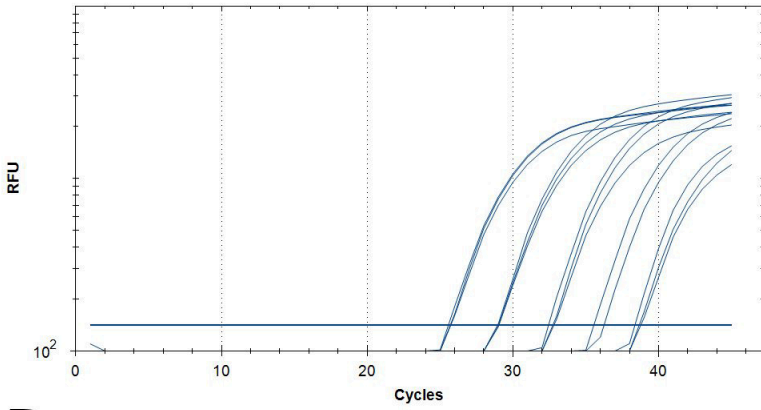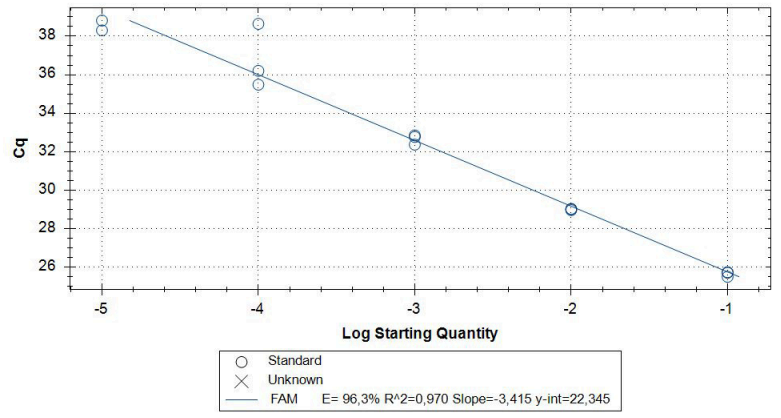**B**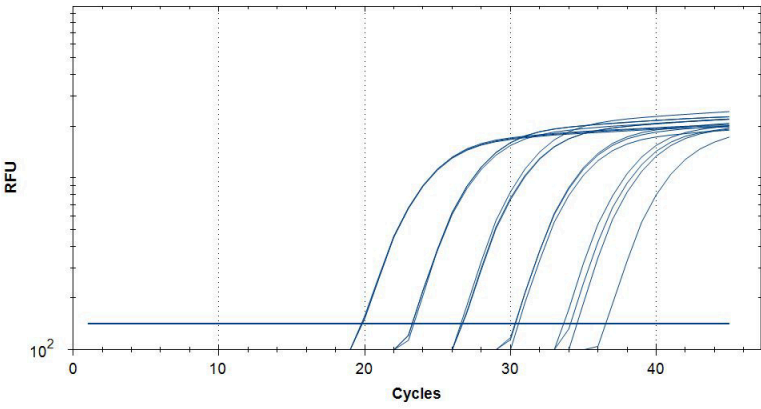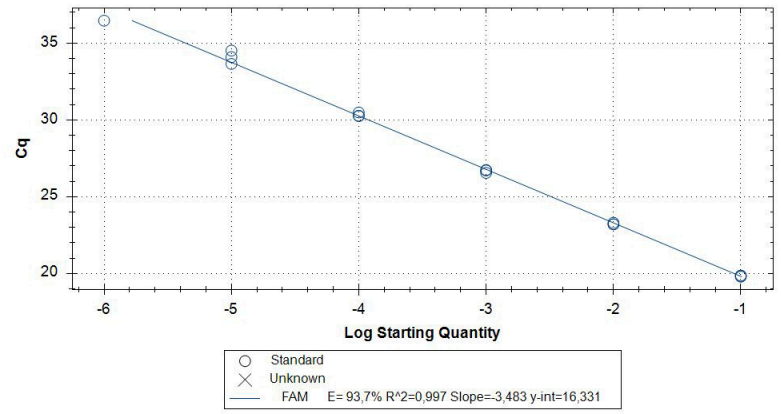**C**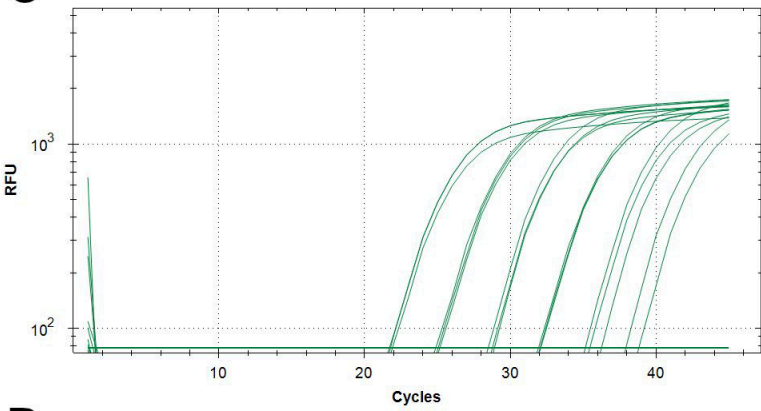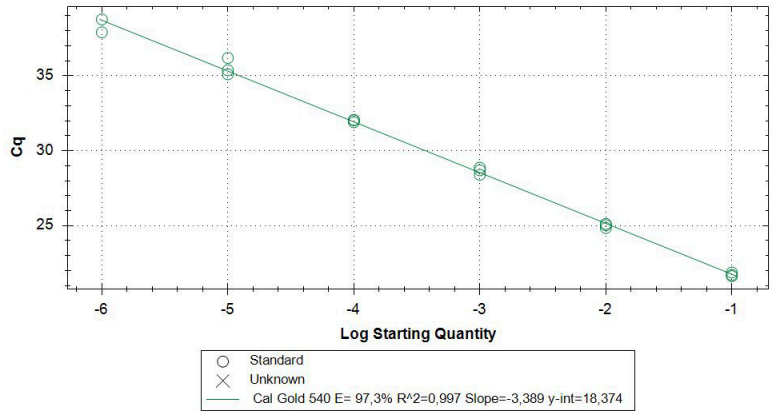**D**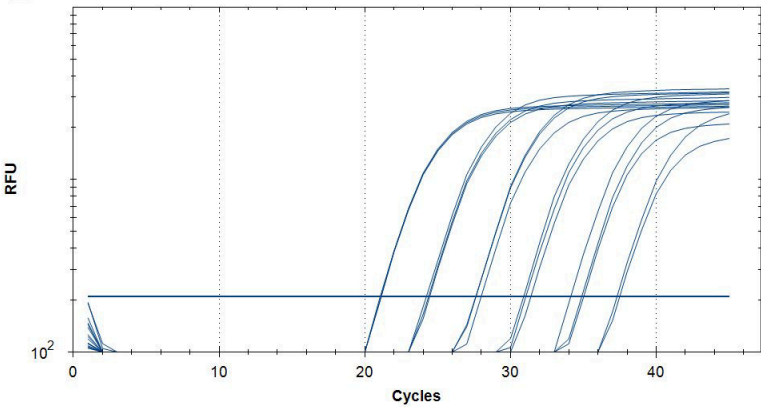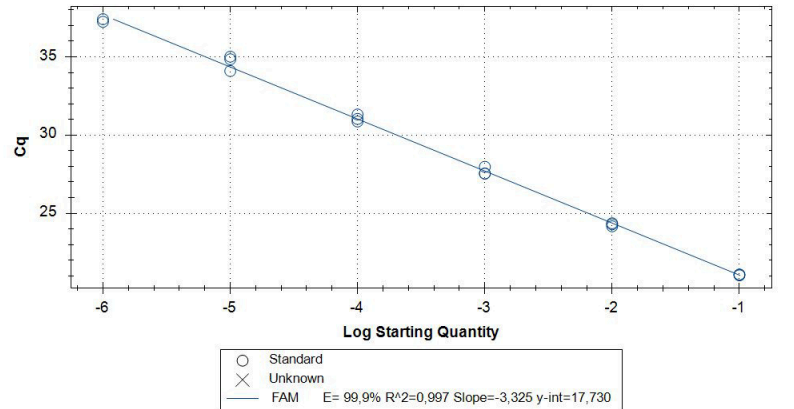

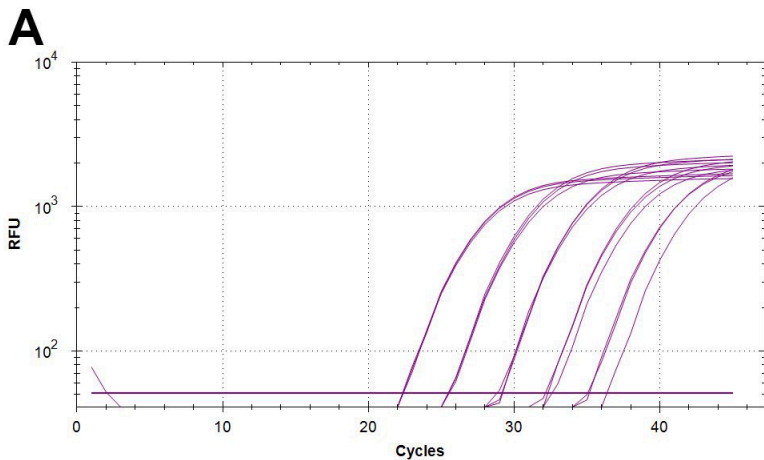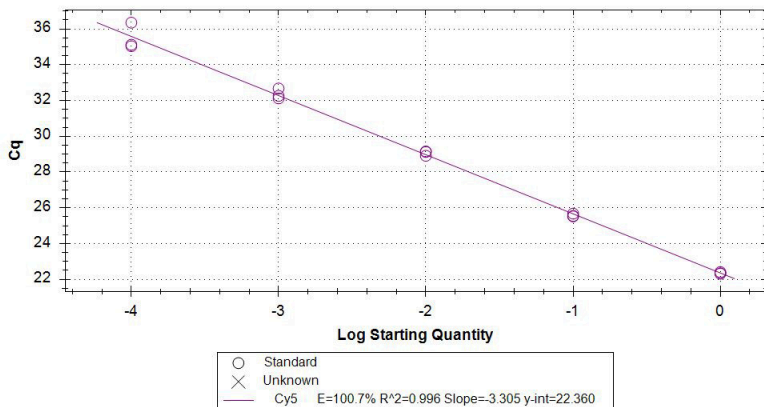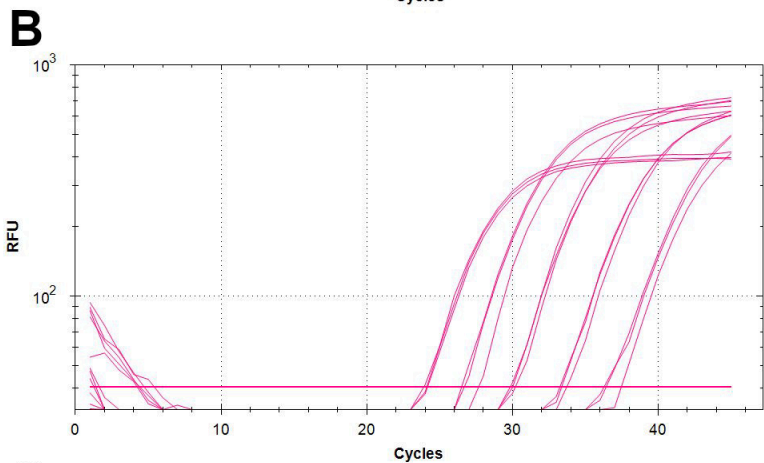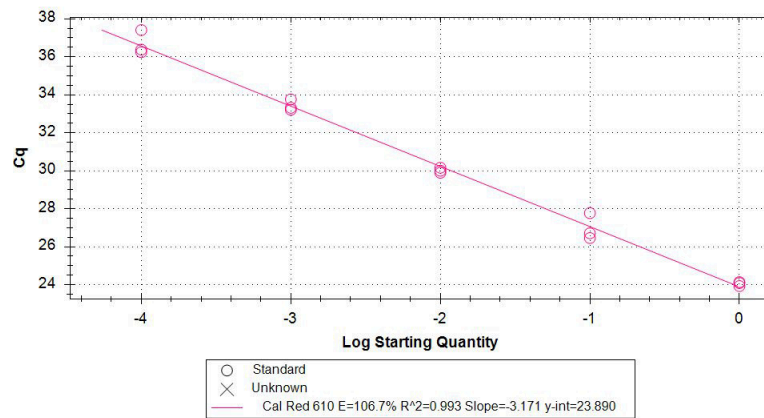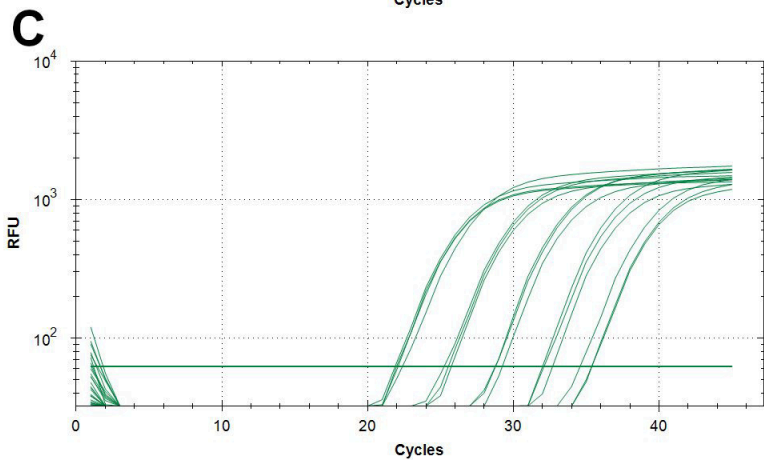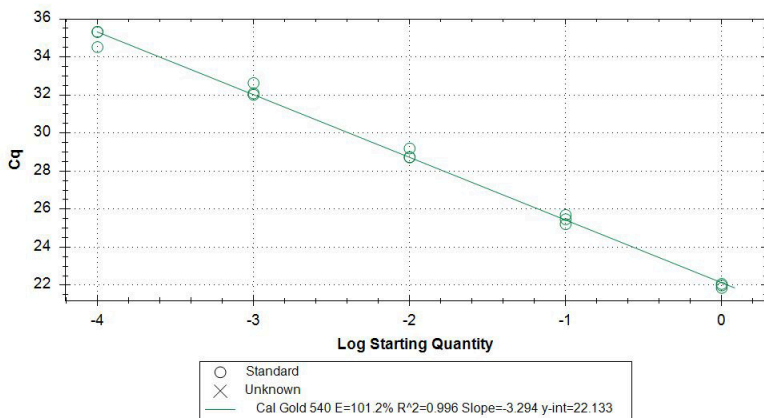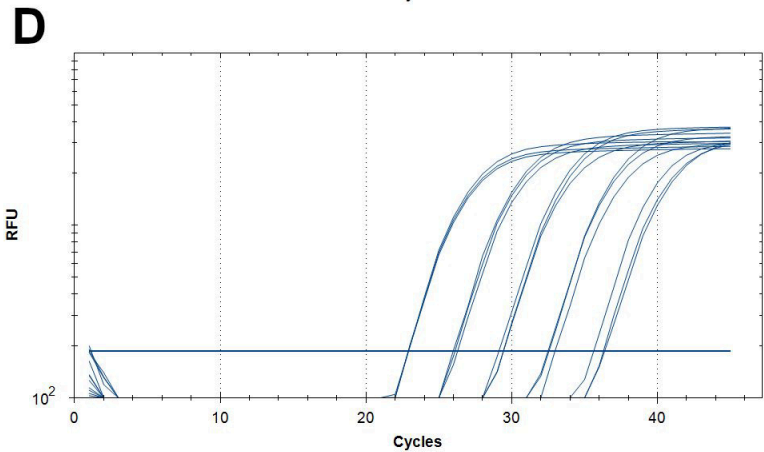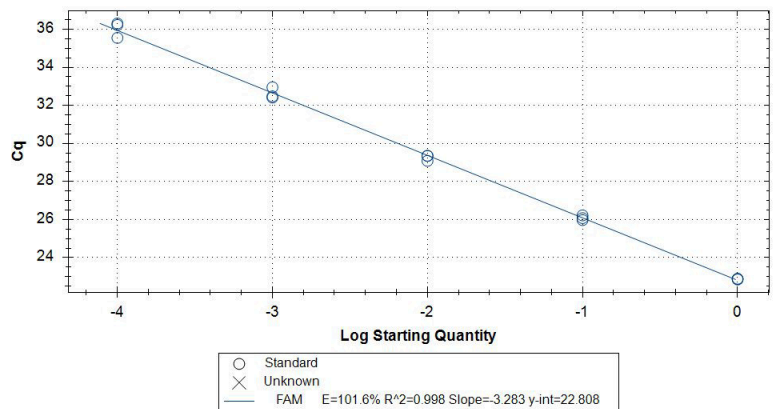

**Table 1: Identified primer and probe sequences for detection and typing of**

*Echinococcus granulosus sensu lato* species by TaqMan® qPCR.

| Assay name        | Primer name         | Product size | Specificity                                 | Sequence                                                   | Final concentration | Gene | Accession No*                   | Position in mitochondrial genome |
|-------------------|---------------------|--------------|---------------------------------------------|------------------------------------------------------------|---------------------|------|---------------------------------|----------------------------------|
| <b>G1_3_qPCR</b>  | Eg_G1-3_cox1_7122_F | 109          | <i>E. granulosus sensu stricto</i> (G1, G3) | AGGGGCTG<br>GTGTTGGTT<br>GGA                               | 200nM               | Cox1 | KJ559023, NC_008075.1, KJ162553 | 7122-7141                        |
|                   | Eg_G1-3_cox1_7230_R |              |                                             | TGAAACACC<br>AGCCAAATG<br>CAGAGA                           | 200nM               |      |                                 | 7230-7207                        |
|                   | Eg_G1-3_cox1_7149_P |              |                                             | 6-Fam or<br>Cy5-TCC GCC<br>GTT GTC CTC<br>GTC GT-<br>BHQ-1 | 200nM               |      |                                 | 7149-7168                        |
| <b>G4_qPCR</b>    | g4_cox1_F           | 109          | <i>E. equinus</i> (G4)                      | AGG TGC<br>TGG TGT<br>TGG TTG AA                           | 200nM               | Cox1 | NC_020374                       | 9408-9427                        |
|                   | g4_cox1_R           |              |                                             | AGA AAC<br>ACC TGC<br>CAA ATG<br>CAA AGA                   | 200nM               |      |                                 | 9516-9493                        |
|                   | g4_cox1_P           |              |                                             | Cy3.5-TCC<br>GCC GTT<br>GTC TTC TTC<br>AT-BMN-<br>Q590     | 200nM               |      |                                 | 9435-9454                        |
| <b>G5_qPCR</b>    | ND5_1433_G5_F       | 127          | <i>E. ortleppi</i> (G5)                     | TGATGGCTG<br>GTAGCGGTG<br>GT                               | 200nM               | Nad5 | AB235846                        | 1433-1452                        |
|                   | ND5_1475_G5_P       |              |                                             | Cy5.5-<br>ACAGGCCTG<br>TTGTGTATG<br>GGTCA-<br>BMN-Q650     | 200nM               |      |                                 | 1475-1497                        |
|                   | ND5_1559_G5_R       |              |                                             | ACCCAATA<br>AACGGAACC<br>CCAGA                             | 200nM               |      |                                 | 1559-1537                        |
| <b>G6_10_qPCR</b> | COX3_2458_Ec_F      | 123          | <i>E. canadensis</i> (G6 -8, G10)           | GTTGTTTTG<br>GTTTGTGTT<br>GGGTTGT                          | 200nM               | Cox3 | NC_011121.1                     | 2458-2482                        |

|                                                  |                    |                                 |                          |                                                          |       |      |              |                                 |
|--------------------------------------------------|--------------------|---------------------------------|--------------------------|----------------------------------------------------------|-------|------|--------------|---------------------------------|
|                                                  | COX3_25<br>05_Ec_P |                                 |                          | FAM or Cy5-<br>TGGGTTGTG<br>TGCTAGGGT<br>TCATCA-<br>MGB  | 200nM |      | MH30<br>1022 | 2505-<br>2528                   |
|                                                  | COX3_25<br>80_Ec_R |                                 |                          | ACCAAAAAT<br>CGCCACCTC<br>ACT                            | 200nM |      |              | 2580-<br>2560                   |
| <b>Internal<br/>control<br/>PCR, IC2<br/>PCR</b> | EGFP1-F            | Hoff<br>mann<br>et al.,<br>2006 | Hoffmann<br>et al., 2006 | GAC CAC<br>TAC CAG<br>CAG AAC AC                         | 500nM | EGFP |              | Hoffma<br>nn et<br>al.,<br>2006 |
|                                                  | EGFP1              |                                 |                          | 5'-HEX- AGC<br>ACC CAG<br>TCC GCC<br>CTG AGC A -<br>BHQ1 | 160nM |      |              |                                 |
|                                                  | EGFP2-R            |                                 |                          | GAA CTC<br>CAG CAG<br>GAC CAT G                          | 500nM |      |              |                                 |

Table 2: Reference DNA sample characteristics.

| Species                   | Genotype  | Animal origin     | Geographical origin |
|---------------------------|-----------|-------------------|---------------------|
| <i>E. granulosus s.s.</i> | G1        | Cattle            | Armenia             |
| <i>E. granulosus s.s.</i> | G3 (,G2') | Sheep             | Armenia             |
| <i>E. granulosus s.s.</i> | G3        | Sheep             | France              |
| <i>E. granulosus s.s.</i> | Gx        | Cattle            | Armenia             |
| <i>E. granulosus s.s.</i> | Gx        | Schaf             | Ethiopia            |
| <i>E. equinus</i>         | G4        | Zebra             | Namibia             |
| <i>E. equinus</i>         | G4        | NA                | NA                  |
| <i>E. ortleppi</i>        | G5        | NA                | NA                  |
| <i>E. ortleppi</i>        | G5        | Cattle            | Kenya               |
| <i>E. ortleppi</i>        | G5        | Cattle            | Zambia              |
| <i>E. canadensis</i>      | G6        | Camel             | Kenya               |
| <i>E. canadensis</i>      | G6        | Camel             | Kenya               |
| <i>E. canadensis</i>      | G7        | NA                | NA                  |
| <i>E. canadensis</i>      | G8        | NA                | Russia              |
| <i>E. canadensis</i>      | G10       | NA                | NA                  |
| <i>E. canadensis</i>      | G10       | Deer (Cervus sp.) | Russia              |
| <i>E. vogeli</i>          |           | NA                | NA                  |
| <i>E. felidis</i>         |           | Warthog           | Namibia             |
| <i>E. cf. granulosus</i>  | G-Omo     | Human             | Ethiopia            |
| <i>T. saginata</i>        |           | Cattle            | Ethiopia            |
| <i>T. hydatigena</i>      |           | Dog               | Ethiopia            |
| <i>E. multilocularis</i>  |           | Red fox           | Germany             |

*s.s.*: *sensu stricto*

Table 3: Specificity test results of TaqMan® qPCR assays.

| Reference DNA                       |          | qPCR         |              |              |              |
|-------------------------------------|----------|--------------|--------------|--------------|--------------|
| Species                             | Genotype | G1_3_qPCR    | G4_qPCR      | G5_10_qPCR   | G5_10_qPCR   |
| <i>E. granulosus</i><br><i>s.s.</i> | G1       | 31.65        | <i>No Cq</i> | <i>No Cq</i> | <i>No Cq</i> |
| <i>E. granulosus</i><br><i>s.s.</i> | G3 (G2') | 28.53        | <i>No Cq</i> | <i>No Cq</i> | <i>No Cq</i> |
| <i>E. granulosus</i><br><i>s.s.</i> | G3       | 27.68        | <i>No Cq</i> | <i>No Cq</i> | <i>No Cq</i> |
| <i>E. granulosus</i><br><i>s.s.</i> | Gx       | 36.90        | <i>No Cq</i> | <i>No Cq</i> | <i>No Cq</i> |
| <i>E. granulosus</i><br><i>s.s.</i> | Gx       | 37.46        | <i>No Cq</i> | <i>No Cq</i> | <i>No Cq</i> |
| <i>E. equinus</i>                   | G4       | <i>No Cq</i> | 39.06        | <i>No Cq</i> | <i>No Cq</i> |
| <i>E. equinus</i>                   | G4       | <i>No Cq</i> | 24.02        | <i>No Cq</i> | <i>No Cq</i> |
| <i>E. ortleppi</i>                  | G5       | <i>No Cq</i> | <i>No Cq</i> | 27.53        | 28.02        |
| <i>E. ortleppi</i>                  | G5       | <i>No Cq</i> | <i>No Cq</i> | 35.96        | 35.54        |
| <i>E. ortleppi</i>                  | G5       | <i>No Cq</i> | <i>No Cq</i> | 26.02        | 26.54        |
| <i>E. canadensis</i>                | G6       | <i>No Cq</i> | <i>No Cq</i> | <i>No Cq</i> | 37.56        |
| <i>E. canadensis</i>                | G6       | <i>No Cq</i> | <i>No Cq</i> | <i>No Cq</i> | 28.37        |
| <i>E. canadensis</i>                | G7       | <i>No Cq</i> | <i>No Cq</i> | <i>No Cq</i> | 25.57        |

|                                 |       |       |       |       |       |
|---------------------------------|-------|-------|-------|-------|-------|
| <b><i>E. canadensis</i></b>     | G8    | No Cq | No Cq | No Cq | 29.6  |
| <b><i>E. canadensis</i></b>     | G10   | No Cq | No Cq | No Cq | 27.11 |
| <b><i>E. canadensis</i></b>     | G10   | No Cq | No Cq | No Cq | 21.0  |
| <b><i>E. vogeli</i></b>         |       | No Cq | No Cq | No Cq | No Cq |
| <b><i>E. felidis</i></b>        |       | No Cq | No Cq | No Cq | No Cq |
| <b><i>E. cf. granulosis</i></b> | G-Omo | No Cq | No Cq | No Cq | No Cq |
| <b><i>T. saginata</i></b>       |       | No Cq | No Cq | No Cq | No Cq |
| <b><i>T. saginata</i></b>       |       | No Cq | No Cq | No Cq | No Cq |
| <b><i>T. hydatigena</i></b>     |       | No Cq | No Cq | No Cq | No Cq |
| <b><i>E. multilocularis</i></b> |       | No Cq | No Cq | No Cq | No Cq |
| <b><i>T. hydatigena</i></b>     |       | No Cq | No Cq | No Cq | No Cq |

s.s.: *sensu stricto*

Table 4: Analytical sensitivity and efficiency of developed TaqMan<sup>®</sup> qPCRs.

| PCR name                | Specificity                        | Efficiency with cloned PCR products | Efficiency clinical DNA           | Detection limit (Copy number/ $\mu$ l at Cq) with cloned PCR products | Detection limit in Cq with clinical DNA |
|-------------------------|------------------------------------|-------------------------------------|-----------------------------------|-----------------------------------------------------------------------|-----------------------------------------|
| G1_3_qPCR (single-plex) | <i>E. granulosus</i> s.s. (G1, G3) | 100.7% ( $R^2=0.99$ , slope=-3.34)  | 96.3% ( $R^2=0.99$ , slope=-3.41) | 0.8/ $\mu$ l at Cq 36 ( $\pm$ 0.9)                                    | 38.24 ( $\pm$ 0.1)                      |
| G4_qPCR (single-plex)   | <i>E. equinus</i> (G4)             | 106.7% ( $R^2=0.99$ , slope=-3.32)  | 93.7% ( $R^2=0.99$ , slope=-3.48) | 0.6/ $\mu$ l at Cq 39 ( $\pm$ 0.6)                                    | 38 ( $\pm$ 1)                           |
| G5_G10_qPCR (duplex)    | <i>E. orteppi</i> (G5)             | 100.7% ( $R^2=0.99$ , slope=-3.34)  | 97.3% ( $R^2=0.99$ , slope=-3.39) | 1.4/ $\mu$ l at Cq 36 ( $\pm$ 0.7)                                    | 37 ( $\pm$ 0.4)                         |
| G5_G10_qPCR (duplex)    | <i>E. canadensis</i> (G6-8, G10)   | 101.6% ( $R^2=0.99$ , slope=-3.28)  | 99.9% ( $R^2=0.99$ , slope=-3.33) | 1.4/ $\mu$ l at Cq 36 ( $\pm$ 0.8)                                    | 38.6 ( $\pm$ 0.17)                      |



Table 5: Detection of *E. granulosus s.l.* species in faecal samples by duplex and triplex TaqMan® qPCRs

| PCR Name                        | Specificity | 1:100§ | 1:100*       | 1:1000*      | 1:10000*     | 1:100000* |
|---------------------------------|-------------|--------|--------------|--------------|--------------|-----------|
| G1_3_qPCR+IC_qPCR<br>(duplex)   | G1, G3      | 24.5   | 30.1 (±0.6)  | 35.2 (±1)    | neg.         | neg.      |
| G4_qPCR+IC_qPCR<br>(duplex)     | G4          | 20.2   | 27.4 (±0,5)  | 30.7 (±1)    | 35.8 (±0.06) | neg.      |
| G5_10_qPCR+IC_qPCR<br>(triplex) | G5          | 21,37  | 30.3 (±0.17) | 32.4 (±0.22) | neg.         | neg.      |
| G5_10_qPCR+IC_qPCR<br>(triplex) | G6-10       | 24.2   | 31.2 (±0.02) | 32.6 (±0.22) | neg.         | neg.      |

§Cq values from 1:100 pre-diluted DNA, extracted from cyst material

\*Cq-Values from re-extracted DNA prepared by logarithmic dilution of the corresponding DNA, used to spike faecal samples (± standard deviation)
